# Supplementary material for: Exopolysaccharide biosynthetic glycoside hydrolases can be utilized to disrupt and prevent Pseudomonas aeruginosa biofilms
Source: PubMed Central journal article supplement — Sci Adv. 2016 May 20;2(5):e1501632. doi: 10.1126/sciadv.1501632 (PMC4928890; doi:10.1126/sciadv.1501632), 2016-05-20
Supplement: 1501632_SM.pdf [file 1501632_SM.pdf]

## Supplementary Materials for

### **Exopolysaccharide biosynthetic glycoside hydrolases can be utilized to disrupt and prevent *Pseudomonas aeruginosa* biofilms**

Perrin Baker, Preston J. Hill, Brendan D. Snarr, Noor Alnabseya, Matthew J. Pestrak, Mark J. Lee, Laura K. Jennings, John Tam, Roman A. Melnyk, Matthew R. Parsek, Donald C. Sheppard, Daniel J. Wozniak, P. Lynne Howell

Published 20 May 2016, *Sci. Adv.* **2**, e1501632 (2016)

DOI: 10.1126/sciadv.1501632

#### **The PDF file includes:**

- table S1. Strains and plasmids used in this study.
- fig. S1. Time course disruption of *P. aeruginosa* biofilms.
- fig. S2. *P. aeruginosa* biofilm disruption by glycoside hydrolases in the presence of serum.
- fig. S3. Biofilm prevention in standing culture pellicle assay.
- fig. S4. Protein stability of PelA<sub>h</sub> and PslG<sub>h</sub> in *P. aeruginosa* culture.
- fig. S5. The growth of *P. aeruginosa* in the presence of glycoside hydrolases.
- fig. S6. Protein stability of PelA<sub>h</sub> and PslG<sub>h</sub> in mammalian cell culture.
- References (76–78)

**table S1. Strains and plasmids used in this study.**

| Strain                                                      | Description                                                                                                                                                                                             | Reference or Source |
|-------------------------------------------------------------|---------------------------------------------------------------------------------------------------------------------------------------------------------------------------------------------------------|---------------------|
| <i>E. coli</i> BL21-CodonPlus® (DE3)-RP                     | F <sup>-</sup> <i>ompT hsdS</i> (r <sub>B</sub> <sup>-</sup> m <sub>B</sub> <sup>-</sup> ) <i>dcm</i> <sup>+</sup> Tet <sup>r</sup> <i>gal</i> λ(DE3) <i>endA</i> [ <i>argU proL Cam</i> <sup>r</sup> ] | Stratagene          |
| <i>P. aeruginosa</i> PAO1                                   | <i>P. aeruginosa</i> wild-type strain; serotype O5                                                                                                                                                      | (76)                |
| PAO1 P <sub>BAD</sub> <i>psl</i>                            | <i>psl-araC</i> -P <sub>BAD</sub> promoter replacement. Expression of <i>psl</i> operon upon induction with L-arabinose                                                                                 | (49)                |
| PAO1 P <sub>BAD</sub> <i>psl</i> Δ <i>pelF</i>              | In-frame deletion of <i>pelF</i> in P <sub>BAD</sub> <i>psl</i> background                                                                                                                              | (60)                |
| PAO1 Δ <i>wspF</i> Δ <i>psl</i> P <sub>BAD</sub> <i>pel</i> | <i>pel-araC</i> -P <sub>BAD</sub> promoter replacement. Expression of <i>pel</i> operon upon induction with L-arabinose                                                                                 | (47)                |
| PA14                                                        | <i>P. aeruginosa</i> wild-type strain; serotype O19                                                                                                                                                     | (77)                |
| Pa 62                                                       | <i>P. aeruginosa</i> isolate (environmental, soil)                                                                                                                                                      | (78)                |
| X13273                                                      | <i>P. aeruginosa</i> isolate (clinical, blood)                                                                                                                                                          | (78)                |
| MSH3                                                        | <i>P. aeruginosa</i> isolate (environmental, water)                                                                                                                                                     | (78)                |
| MSH10                                                       | <i>P. aeruginosa</i> isolate (environmental, water)                                                                                                                                                     | (78)                |
| 19660                                                       | <i>P. aeruginosa</i> isolate (clinical, blood)                                                                                                                                                          | (78)                |
| CF127                                                       | <i>P. aeruginosa</i> isolate (clinical, from cystic fibrosis patient)                                                                                                                                   | (78)                |
| IMR-90                                                      | normal human female lung fibroblasts; diploid; stable                                                                                                                                                   | ATCC® CCL-186™      |

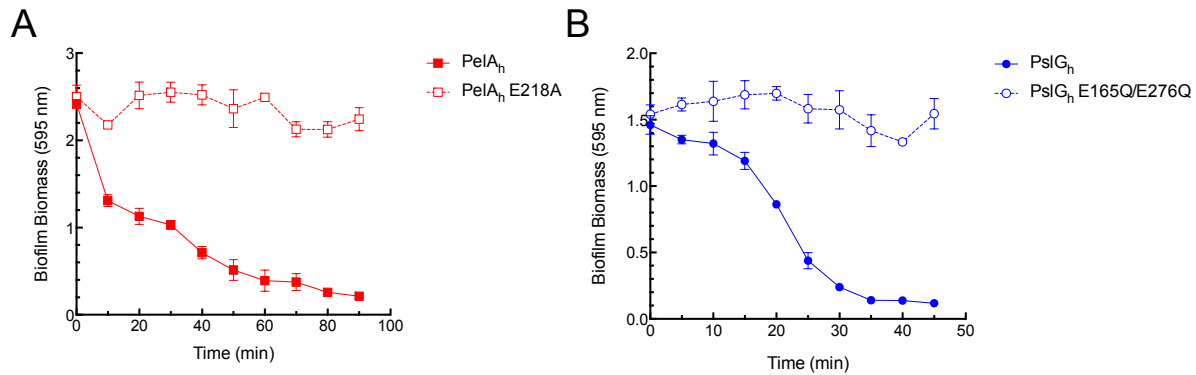

**fig S1. Time course disruption of *P. aeruginosa* biofilms.** Crystal violet staining of biofilms following the exogenous addition of glycoside hydrolases **(A)** PelA<sub>h</sub> and **(B)** PslG<sub>h</sub> on their respective exopolysaccharide. Each data point represents the mean from *n* = 3 crystal violet microtiter plate wells. Error bars indicate SEM.

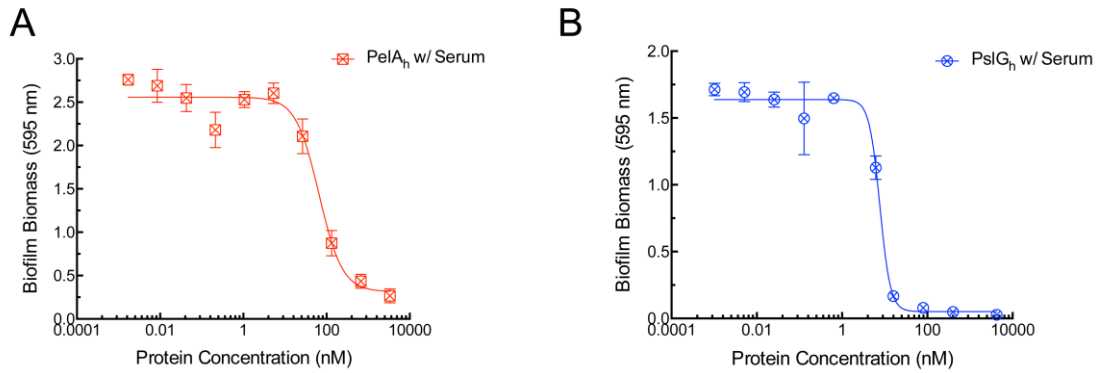

**fig. S2. *P. aeruginosa* biofilm disruption by glycoside hydrolases in the presence of serum.** Dose-response curves to examine the dispersal of biofilm biomass by the exogenous treatment of each glycoside hydrolase and variant. Each data point represents the mean from three independent experiments of  $n = 3$  crystal violet microtiter plate wells. EC<sub>50</sub> values were calculated using non-linear least-squares fitting to a dose-response model. Error bars indicate SEM.

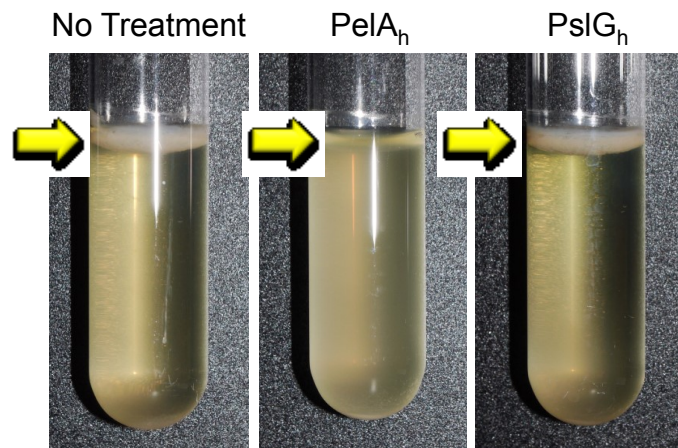

**fig. S3. Biofilm prevention in standing culture pellicle assay.** Biofilm formation at the air-liquid interface was examined in Pel-dependent culture following incubation with PelA<sub>h</sub> and PslG<sub>h</sub>. Arrows indicate the location of the air-liquid interface where biofilm formation occurs.

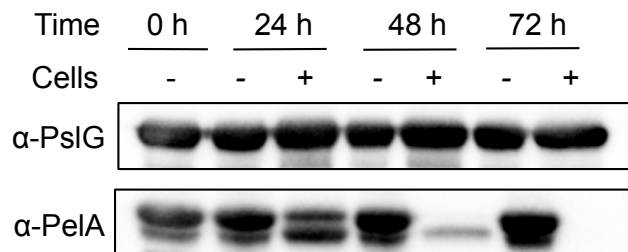

**fig. S4. Protein stability of PelA<sub>h</sub> and PslG<sub>h</sub> in *P. aeruginosa* culture.** Western blotting using  $\alpha$ -PelA and  $\alpha$ -PslG to detect the presence of exogenously applied PelA<sub>h</sub> and PslG<sub>h</sub> at various time points during incubating with *P. aeruginosa* Pel and Psl biofilm formation, respectively. Incubation of each glycoside hydrolase in the absence of *P. aeruginosa* culture (Cell -) was utilized for comparison.

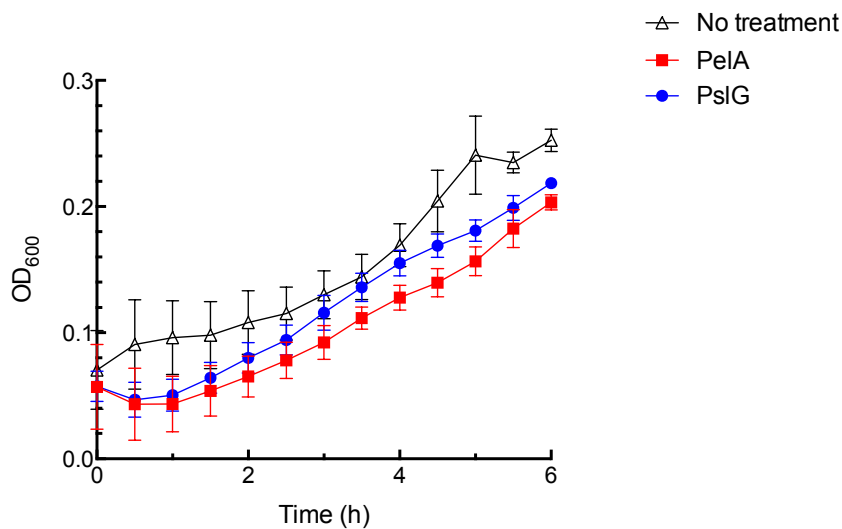

**fig. S5. The growth of *P. aeruginosa* in the presence of glycoside hydrolases..** Growth curve with *P. aeruginosa* PAO1 in the presence of PslG<sub>h</sub> and PelA<sub>h</sub> over 6 h at 37 °C.

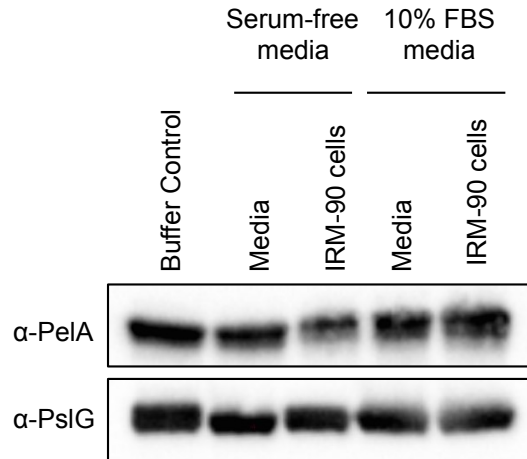

**fig. S6. Protein stability of PelA<sub>h</sub> and PslG<sub>h</sub> in mammalian cell culture.** Western blotting of exogenously added PelA<sub>h</sub> and PslG<sub>h</sub> after 48 h incubation in IMR-90 cell culture in the presence and absence of 10% FBS in the media.
